# Supplementary material
Source: Springer Nature journal article supplement (https://www.springermedizin.de/resource/supplementary/12889_2004_225_MOESM3_ESM.pdf/9500698)
Supplement: MOESM3 [file 9500698]

- 
- Thoroughly wash hands with soap and warm water after activities such as:
    - Diaper changes
    - Feeding or bathing child
    - Wiping child's runny nose or drool
    - Handling child's toys
  - Do not share cups, plates, utensils, toothbrushes, or food
  - Do not kiss on or near the mouth
  - Do not share towels or washcloths
  - Clean toys, countertops and other surfaces that come in contact with urine or saliva.
-
